# Supplementary material
Source: PubMed Central journal article supplement (PMC1854845)
Supplement: neo0904_0292SD1.pdf [file neo0904_0292SD1.pdf]

**Table W1.** Frequency Analysis of Gene Occurrence on Training Data Sets.

A. Frequency of Gene Occurrences in the 2000 Classifiers for the Khan et al. SRBCT Study

| Index | Clone_ID | Symbol          | Z Score |
|-------|----------|-----------------|---------|
| 1     | 784224   | <i>FGFR4</i>    | 52.17   |
| 122   | 812105   | <i>AF1Q</i>     | 48.16   |
| 128   | 814260   | <i>FVT1</i>     | 48.16   |
| 173   | 796258   | <i>SGCA</i>     | 46.43   |
| 186   | 1435862  | <i>CD99</i>     | 45.29   |
| 245   | 770394   | <i>FCGRT</i>    | 45.29   |
| 254   | 377461   | <i>CAV1</i>     | 43.57   |
| 367   | 207274   | <i>NULL</i>     | 42.99   |
| 421   | 866702   | <i>PTPN13</i>   | 39.55   |
| 482   | 244618   | <i>FRCP2</i>    | 39.55   |
| 508   | 298062   | <i>TNNT2</i>    | 34.96   |
| 544   | 52076    | <i>OLFM1</i>    | 33.82   |
| 553   | 769716   | <i>NF2</i>      | 32.67   |
| 565   | 491565   | <i>CITED2</i>   | 31.52   |
| 602   | 325182   | <i>CDH2</i>     | 30.95   |
| 606   | 296448   | <i>IGF2</i>     | 29.80   |
| 741   | 143306   | <i>NULL</i>     | 28.65   |
| 822   | 25725    | <i>FDFT1</i>    | 28.08   |
| 835   | 308231   | <i>MYO1B</i>    | 27.51   |
| 845   | 43733    | <i>GYG2</i>     | 25.79   |
| 909   | 236282   | <i>WAS</i>      | 25.21   |
| 975   | 859359   | <i>TP53I3</i>   | 25.21   |
| 1002  | 1471841  | <i>ATP1A1</i>   | 24.64   |
| 1054  | 839552   | <i>NCOA1</i>    | 24.07   |
| 1065  | 461425   | <i>MYL4</i>     | 22.92   |
| 1073  | 629896   | <i>MAP1B</i>    | 22.92   |
| 1083  | 486110   | <i>PFN2</i>     | 22.34   |
| 1104  | 788107   | <i>BIN1</i>     | 22.34   |
| 1193  | 42558    | <i>GATM</i>     | 21.20   |
| 1206  | 241412   | <i>ELF1</i>     | 21.20   |
| 1318  | 713922   | <i>GSTM2</i>    | 21.20   |
| 1326  | 878652   | <i>PCOLCE</i>   | 20.62   |
| 1388  | 786084   | <i>CBX1</i>     | 20.05   |
| 1426  | 1409509  | <i>TNNT1</i>    | 19.48   |
| 1600  | 244637   | <i>CRI1</i>     | 19.48   |
| 1644  | 789253   | <i>PSEN2</i>    | 18.33   |
| 1661  | 357031   | <i>TNFAIP6</i>  | 17.76   |
| 1707  | 134748   | <i>GCSH</i>     | 17.76   |
| 1722  | 183337   | <i>HLA-DMA</i>  | 17.76   |
| 1737  | 813841   | <i>PLAT</i>     | 17.76   |
| 1771  | 814444   | <i>CRSP9</i>    | 17.18   |
| 1798  | 377048   | <i>MYO1B</i>    | 17.18   |
| 1885  | 771323   | <i>PLOD</i>     | 17.18   |
| 1895  | 897788   | <i>PTPRF</i>    | 17.18   |
| 1910  | 214572   | <i>CDK6</i>     | 16.61   |
| 1953  | 142134   | <i>ARHGAP8</i>  | 16.61   |
| 1954  | 756401   | <i>RHEB</i>     | 16.03   |
| 1979  | 293500   | <i>FLJ90440</i> | 16.03   |
| 2045  | 811108   | <i>TRIP6</i>    | 15.46   |
| 2049  | 504791   | <i>GSTA4</i>    | 15.46   |
| 2143  | 1473131  | <i>TLE2</i>     | 14.89   |
| 2145  | 898219   | <i>MEST</i>     | 14.89   |
| 2156  | 841641   | <i>CCND1</i>    | 14.89   |
| 2158  | 295985   | <i>NULL</i>     | 14.89   |

B. Frequency of Gene Occurrences in the 1000 Classifiers for the Latulippe et al. Prostate Study

| Probe Set  | Symbol       | Z Score |
|------------|--------------|---------|
| 37407_s_at | <i>MYH11</i> | 147.59  |
| 32582_at   | <i>MYH11</i> | 133.02  |
| 767_at     | <i>MYH11</i> | 126.4   |
| 1197_at    | <i>ACTG2</i> | 122.42  |
| 36931_at   | <i>TAGLN</i> | 101.23  |
| 32755_at   | <i>ACTA2</i> | 85.34   |
| 37576_at   | <i>PCP4</i>  | 81.36   |
| 774_g_at   | <i>MYH11</i> | 80.04   |
| 34203_at   | <i>CNN1</i>  | 40.3    |

**Table W1.** (continued)

B. Frequency of Gene Occurrences in the 1000 Classifiers for the Latulippe et al. Prostate Study

| Probe Set  | Symbol           | Z Score |
|------------|------------------|---------|
| 36834_at   | <i>MOXD1</i>     | 36.33   |
| 39333_at   | <i>COL4A1</i>    | 35.01   |
| 773_at     | <i>MYH11</i>     | 31.03   |
| 38834_at   | <i>TOPBP1</i>    | 29.71   |
| 685_f_at   | <i>LOC112714</i> | 29.71   |
| 34878_at   | <i>SMC4L1</i>    | 28.38   |
| 35970_g_at | <i>MPHOSPH9</i>  | 28.38   |
| 41137_at   | <i>PPP1R12B</i>  | 27.06   |
| 1884_s_at  | <i>PCNA</i>      | 25.73   |
| 40407_at   | <i>KPNA2</i>     | 25.73   |
| 32662_at   | <i>MDC1</i>      | 24.41   |
| 34376_at   | <i>PKIG</i>      | 24.41   |
| 35742_at   | <i>C16orf45</i>  | 24.41   |
| 36987_at   | <i>LMNB2</i>     | 24.41   |
| 39145_at   | <i>MYL9</i>      | 23.09   |
| 38430_at   | <i>FABP4</i>     | 21.76   |
| 1599_at    | <i>CDKN3</i>     | 20.44   |
| 2012_s_at  | <i>PRKDC</i>     | 20.44   |
| 32305_at   | <i>COL1A2</i>    | 20.44   |
| 418_at     | <i>MKI67</i>     | 20.44   |
| 651_at     | <i>RPA3</i>      | 20.44   |
| 35474_s_at | <i>COL1A1</i>    | 19.11   |
| 37749_at   | <i>MEST</i>      | 19.11   |
| 38031_at   | <i>DDX48</i>     | 19.11   |
| 39990_at   | <i>ISL1</i>      | 19.11   |
| 1505_at    | <i>TYMS</i>      | 17.79   |
| 33924_at   | <i>RAB6IP1</i>   | 17.79   |
| 35694_at   | <i>MAP4K4</i>    | 17.79   |
| 32306_g_at | <i>COL1A2</i>    | 16.46   |
| 32847_at   | <i>MYLK</i>      | 16.46   |
| 37305_at   | <i>EZH2</i>      | 16.46   |
| 41081_at   | <i>BUB1</i>      | 16.46   |
| 32272_at   | <i>K-ALPHA-1</i> | 15.14   |
| 36627_at   | <i>SPARCL1</i>   | 15.14   |
| 37347_at   | <i>CKS1B</i>     | 15.14   |
| 39519_at   | <i>KIAA0692</i>  | 15.14   |
| 40845_at   | <i>ILF3</i>      | 15.14   |

C. Frequency of Gene Occurrences in the 2000 Classifiers for the Lapointe et al. Prostate Cancer Study

| Index | CLID          | Symbol              | Z Score |
|-------|---------------|---------------------|---------|
| 1590  | IMAGE:288663  | <i>GJB1</i>         | 282.87  |
| 250   | IMAGE:136605  | <i>POMP</i>         | 264.49  |
| 3388  | IMAGE:788180  | <i>AMACR</i>        | 225.69  |
| 812   | IMAGE:179211  | <i>GPR160</i>       | 222.63  |
| 44    | IMAGE:1034473 | <i>AMACR</i>        | 205.27  |
| 1094  | IMAGE:2057931 | <i>TACSTD1</i>      | 182.81  |
| 2817  | IMAGE:685516  | <i>GPR160</i>       | 174.64  |
| 2330  | IMAGE:470216  | <i>MYO6</i>         | 154.22  |
| 2072  | IMAGE:396839  | <i>NULL</i>         | 118.48  |
| 782   | IMAGE:1709503 | <i>NULL</i>         | 96.02   |
| 2109  | IMAGE:415962  | <i>PCSK6</i>        | 86.83   |
| 3017  | IMAGE:745283  | <i>DKFZp779Q175</i> | 86.83   |
| 1592  | IMAGE:288770  | <i>TMEM144</i>      | 76.62   |
| 1098  | IMAGE:2062404 | <i>MON1B</i>        | 68.45   |
| 1295  | IMAGE:244391  | <i>PRKCBP1</i>      | 68.45   |
| 2277  | IMAGE:460164  | <i>C20orf74</i>     | 64.37   |
| 4104  | IMAGE:898286  | <i>CDC2</i>         | 54.16   |
| 1076  | IMAGE:2043415 | <i>DAPK1</i>        | 52.11   |
| 3951  | IMAGE:855406  | <i>NULL</i>         | 52.11   |
| 2116  | IMAGE:416374  | <i>TSPAN13</i>      | 52.11   |
| 2583  | IMAGE:510534  | <i>TACSTD1</i>      | 51.09   |
| 1294  | IMAGE:244350  | <i>NULL</i>         | 48.03   |
| 2589  | IMAGE:510856  | <i>ENC1</i>         | 47.01   |
| 3580  | IMAGE:811101  | <i>SH3RF1</i>       | 43.95   |
| 1249  | IMAGE:23819   | <i>ABCG1</i>        | 42.92   |
| 1173  | IMAGE:2244718 | <i>GCNT1</i>        | 40.16   |

**Table W2.** Classifiers Generated by GP for Each Training Data Set.

| Classification Rules                                                                                    | Gene Description                                                                                                                            |
|---------------------------------------------------------------------------------------------------------|---------------------------------------------------------------------------------------------------------------------------------------------|
| <b>A. Classifiers that distinguish different cancer classes of SRBCT</b>                                |                                                                                                                                             |
| IF IMAGE:183337 > exp(IMAGE:796613) THEN BL                                                             | IMAGE:183337 is HLA-DMB; IMAGE:796613 is COL5A2;                                                                                            |
| IF (IMAGE:767183 – IMAGE:504791) > IMAGE:813742 THEN BL                                                 | IMAGE:767183 is HCLS1; IMAGE:504791 is GSTA4; IMAGE:813742 is XPO6;                                                                         |
| IF (IMAGE:767183/IMAGE:810408 – IMAGE:504791) > IMAGE:809383 THEN BL                                    | IMAGE:767183 is HCLS1; IMAGE:810408 is ERGIC3; IMAGE:504791 is GSTA4; IMAGE:809383 is PPNAN;                                                |
| IF log(sqrt(IMAGE:183337)) > tanh(IMAGE:308746) THEN BL                                                 | IMAGE:183337 is HLA-DMB; IMAGE:308746 is EXT2;                                                                                              |
| IF (IMAGE:740604*IMAGE:183462 – IMAGE:250654) > (IMAGE:325155 * IMAGE:813444)*IMAGE:815555 THEN BL      | IMAGE:740604 is ISG20; IMAGE:183462 is MAN2C1; IMAGE:250654 is SPARC; IMAGE:325155 is KRT34; IMAGE:813444 is SLC12A8; IMAGE:815555 is DGKA; |
| IF (IMAGE:767183 – IMAGE:504791) >= IMAGE:813742 THEN BL                                                | IMAGE:767183 is HCLS1; IMAGE:504791 is GSTA4; IMAGE:813742 is XPO6;                                                                         |
| IF (sin(IMAGE:140171) > IMAGE:854899^2) && ((IMAGE:767183 – IMAGE:504791) > IMAGE:486110^2) THEN BL     | IMAGE:140171 is THTPA; IMAGE:854899 is DUSP6; IMAGE:767183 is HCLS1; IMAGE:504791 is GSTA4; IMAGE:486110 is PFN2;                           |
| IF (IMAGE:740604*cos(IMAGE:897632) – IMAGE:250654) > IMAGE:183462 THEN BL                               | IMAGE:740604 is ISG20; IMAGE:897632 is ATP2A2; IMAGE:250654 is SPARC; IMAGE:183462 is MAN2C1;                                               |
| IF tanh(IMAGE:203003) <= IMAGE:740604 THEN BL                                                           | IMAGE:203003 is DECR2; IMAGE:740604 is ISG20;                                                                                               |
| IF (IMAGE:740604*tanh(IMAGE:563673)) > (2.0 * IMAGE:250654) THEN BL                                     | IMAGE:740604 is ISG20; IMAGE:563673 is ALDH7A1; IMAGE:250654 is SPARC                                                                       |
| IF (IMAGE:866702 * IMAGE:814260) > IMAGE:295985 THEN EWS                                                | IMAGE:866702 is PTPN13; IMAGE:814260 is FVT1; IMAGE:295985 is CDK6;                                                                         |
| IF (IMAGE:866702/IMAGE:1469230) > IMAGE:295985 THEN EWS                                                 | IMAGE:866702 is PTPN13; IMAGE:1469230 is COX8A; IMAGE:295985 is CDK6;                                                                       |
| IF sqrt(IMAGE:770394/IMAGE:52076) <= IMAGE:770394 THEN EWS                                              | IMAGE:770394 is FCGRT; IMAGE:52076 is OLFM1; IMAGE:770394 is FCGRT;                                                                         |
| IF (IMAGE:178825 * IMAGE:52076) > IMAGE:295985 THEN EWS                                                 | IMAGE:178825 is NRGN; IMAGE:52076 is OLFM1; IMAGE:295985 is CDK6;                                                                           |
| IF (IMAGE:866702 * IMAGE:80338) > IMAGE:295985 THEN EWS                                                 | IMAGE:866702 is PTPN13; IMAGE:80338 is SELENBP1; IMAGE:295985 is CDK6;                                                                      |
| IF IMAGE:770394 > (sqrt(IMAGE:244951))/(IMAGE:357031/IMAGE:855391)) THEN EWS                            | IMAGE:770394 is FCGRT; IMAGE:244951 is HIF3A; IMAGE:357031 is TNFAIP6; IMAGE:855391 is STK25;                                               |
| IF IMAGE:43733 > IMAGE:295985 THEN EWS                                                                  | IMAGE:43733 is GYG2; IMAGE:295985 is CDK6;                                                                                                  |
| IF (IMAGE:770394 + IMAGE:214906) > IMAGE:842820 THEN EWS                                                | IMAGE:770394 is FCGRT; IMAGE:214906 is SPEN; IMAGE:842820 is PABPC4;                                                                        |
| IF IMAGE:866702 * sqrt(IMAGE:138550) > IMAGE:295985 THEN EWS                                            | IMAGE:866702 is PTPN13; IMAGE:138550 is ZNF444; IMAGE:295985 is CDK6;                                                                       |
| IF IMAGE:377461 > sqrt(IMAGE:132911) THEN EWS                                                           | IMAGE:377461 is CAV1; IMAGE:132911 is PPP1CB;                                                                                               |
| IF IMAGE:364510 > IMAGE:810057^2 THEN NB                                                                | IMAGE:364510 is SATB1; IMAGE:810057 is CSDA;                                                                                                |
| IF (3.951/sqrt(IMAGE:1409509)) > (exp(IMAGE:810057^2)/(IMAGE:135688^2 + sqrt(IMAGE:1472775)^2) THEN NB  | IMAGE:1409509 is TNNT1; IMAGE:810057 is CSDA; IMAGE:135688 is GATA2; IMAGE:1472775 is COL8A1;                                               |
| IF ((8.714/exp(IMAGE:121521))/exp(IMAGE:546600)) > ((IMAGE:810057^2)/(IMAGE:325182^2)) THEN NB          | IMAGE:121521 is ZNF764; IMAGE:546600 is DNAJB4; IMAGE:810057 is CSDA; IMAGE:325182 is CDH2;                                                 |
| IF IMAGE:364510 > (IMAGE:810057 + ((IMAGE:759200^2)/(4.276/sin(IMAGE:24415)))) THEN NB                  | IMAGE:364510 is SATB1; IMAGE:810057 is CSDA; IMAGE:759200 is DHPS; IMAGE:24415 is TP53;                                                     |
| IF IMAGE:811956 > IMAGE:810057 AND (IMAGE:23132 > cos(IMAGE:491001)) THEN NB                            | IMAGE:811956 is RAN; IMAGE:810057 is CSDA; IMAGE:23132 is SF3A1; IMAGE:491001 is GLO1;                                                      |
| IF IMAGE:325182*((exp(IMAGE:840942))^2) > ((IMAGE:789376*(-1.222))/1.791) THEN NB                       | IMAGE:325182 is CDH2; IMAGE:840942 is HLA-DPB1; IMAGE:789376 is TXNRD1;                                                                     |
| IF IMAGE:823886 > exp(IMAGE:810057) THEN NB                                                             | IMAGE:823886 is NDEL1; IMAGE:810057 is CSDA;                                                                                                |
| IF ((exp(IMAGE:812105)/5.506)^2) > (IMAGE:323577 + IMAGE:824426 * IMAGE:814266) THEN NB                 | IMAGE:812105 is MLLT11; IMAGE:323577 is SLC4A2; IMAGE:824426 is PDAP1; IMAGE:814266 is PRKCZ;                                               |
| IF exp(IMAGE:810057) <= (IMAGE:395708 + IMAGE:788205 + IMAGE:383188) THEN NB                            | IMAGE:810057 is CSDA; IMAGE:395708 is DPYSL4; IMAGE:788205 is SOX4; IMAGE:383188 is RCVRN;                                                  |
| IF IMAGE:810057 <= IMAGE:29054 THEN NB                                                                  | IMAGE:810057 is CSDA; IMAGE:29054 is SCGN;                                                                                                  |
| IF (IMAGE:298062/IMAGE:40017) > (IMAGE:549146*IMAGE:784224) THEN RMS                                    | IMAGE:298062 is TNNT2; IMAGE:40017 is CYCS; IMAGE:549146 is TRIM22; IMAGE:784224 is FGFR4;                                                  |
| IF (IMAGE:511909/IMAGE:784224) <= IMAGE:461425 THEN RMS                                                 | IMAGE:511909 is CDH17; IMAGE:784224 is FGFR4; IMAGE:461425 is MYL4;                                                                         |
| IF (IMAGE:898219^2 + IMAGE:461425)^2 > IMAGE:82131 THEN RMS                                             | IMAGE:898219 is MEST; IMAGE:461425 is MYL4; IMAGE:82131 is PSMB1;                                                                           |
| IF ((IMAGE:265102 + IMAGE:207274) > IMAGE:244618) AND ((IMAGE:784224 + IMAGE:244618) > 1.8594) THEN RMS | IMAGE:265102 is ABI2; IMAGE:207274 is IGF2; IMAGE:244618 is FNDC5; IMAGE:784224 is FGFR4; IMAGE:244618 is FNDC5;                            |
| IF IMAGE:796258 > (IMAGE:340630/IMAGE:784224) THEN RMS                                                  | IMAGE:796258 is SGCA; IMAGE:340630 is MAP3K8; IMAGE:784224 is FGFR4;                                                                        |
| IF (IMAGE:244618/IMAGE:52076) > (IMAGE:809939/IMAGE:813841) THEN RMS                                    | IMAGE:244618 is FNDC5; IMAGE:52076 is OLFM1; IMAGE:809939 is C6orf48; IMAGE:813841 is PLAT;                                                 |
| IF (IMAGE:950367/(IMAGE:244618/IMAGE:52076)) <= (IMAGE:142134 + IMAGE:143306^2) THEN RMS                | IMAGE:950367 is ADAR; IMAGE:244618 is FNDC5; IMAGE:52076 is OLFM1; IMAGE:142134 is PRR5; IMAGE:143306 is LOC645166;                         |

**Table W2.** (continued)

| Classification Rules                                                                           | Gene Description                                                                                                             |
|------------------------------------------------------------------------------------------------|------------------------------------------------------------------------------------------------------------------------------|
| <b>A. Classifiers that distinguish different cancer classes of SRBCT</b>                       |                                                                                                                              |
| IF IMAGE:784224 > IMAGE:781341 THEN RMS                                                        | IMAGE:784224 is FGFR4; IMAGE:781341 is TULP4;                                                                                |
| IF (IMAGE:461425 + IMAGE:898219 <sup>2</sup> ) > IMAGE:825312 THEN RMS                         | IMAGE:461425 is MYL4; IMAGE:898219 is MEST; IMAGE:825312 is ATP5J;                                                           |
| IF IMAGE:298062 > (0.045022 + IMAGE:110467 + sin(IMAGE:784224)) THEN RMS                       | IMAGE:298062 is TNNT2; IMAGE:110467 is CAV2; IMAGE:784224 is FGFR4;                                                          |
| <b>B. Classifiers that distinguish metastatic prostate cancer from primary prostate cancer</b> |                                                                                                                              |
| IF (36987_at >= 767_at) THEN MET                                                               | 36987_at is LMNB2; 767_at is MYH11                                                                                           |
| IF (40145_at >= 32582_at) THEN MET                                                             | 40145_at is TOP2A; 32582_at is MYH11                                                                                         |
| IF (40398_s_at > 32755_at) THEN MET                                                            | 40398_s_at is MEOX2; 32755_at is ACTA2                                                                                       |
| IF (39145_at <= 39333_at) THEN MET                                                             | 39145_at is MYL9; 39333_at is COL4A1                                                                                         |
| IF (767_at < 37263_at) THEN MET                                                                | 767_at is MYH11; 37263_at is GGH                                                                                             |
| IF (38505_at >= 37576_at) THEN MET                                                             | 38505_at is EIF2C2; 37576_at is PCP4                                                                                         |
| IF (36931_at < 418_at) THEN MET                                                                | 36931_at is TAGLN; 418_at is MKI67                                                                                           |
| IF (774_g_at <= 1232_s_at) THEN MET                                                            | 774_g_at is MYH11; 1232_s_at is IGFBP1                                                                                       |
| IF (1276_g_at < 32120_at) THEN MET                                                             | 1276_g_at is RBPMS; 32120_at is SPAG5                                                                                        |
| IF (32582_at < 38430_at) THEN MET                                                              | 32582_at is MYH11; 38430_at is FABP4                                                                                         |
| IF (37407_s_at < 1648_at) THEN MET                                                             | 37407_s_at is MYH11; 1648_at is OSMR                                                                                         |
| IF (773_at <= 32306_g_at) THEN MET                                                             | 773_at is MYH11; 32306_g_at is COL1A2                                                                                        |
| IF (39714_at <= 1260_s_at) THEN MET                                                            | 39714_at is SH3BGRL; 1260_s_at is GSTA1                                                                                      |
| IF (39109_at >= 828_at) THEN MET                                                               | 39109_at is TPX2; 828_at is PTGER2                                                                                           |
| IF (36572_r_at > 37407_s_at) THEN MET                                                          | 36572_r_at is ARL6IP1; 37407_s_at is MYH11                                                                                   |
| IF (774_g_at < 35970_g_at) THEN MET                                                            | 774_g_at is MYH11; 35970_g_at is MPHOSPH9                                                                                    |
| IF (767_at <= 546_at) THEN MET                                                                 | 767_at is MYH11; 546_at is PKIA                                                                                              |
| IF (773_at <= 37749_at) THEN MET                                                               | 773_at is MYH11; 37749_at is MEST                                                                                            |
| IF (418_at > 36931_at) THEN MET                                                                | 418_at is MKI67; 36931_at is TAGLN                                                                                           |
| IF (32272_at >= 32582_at) THEN MET                                                             | 32272_at is TUBA3; 32582_at is MYH11                                                                                         |
| <b>C. Classifiers that distinguish primary prostate cancer from benign control</b>             |                                                                                                                              |
| IF (IMAGE:510856 + IMAGE:288663) >= -0.890150 THEN PCA                                         | IMAGE:510856 is ENC1; IMAGE:288663 is GJB1                                                                                   |
| IF (IMAGE:470216 + IMAGE:788180) >= -2.677600 THEN PCA                                         | IMAGE:470216 is MYO6; IMAGE:788180 is AMACR                                                                                  |
| IF (IMAGE:416374 + IMAGE:244391) >= -0.417200 THEN PCA                                         | IMAGE:416374 is TSPAN13; IMAGE:244391 is PRKCBP1                                                                             |
| IF (IMAGE:460164 + IMAGE:2043415) >= -0.776500 THEN PCA                                        | IMAGE:460164 is C20ORF74; IMAGE:2043415 is DAPK1                                                                             |
| IF (IMAGE:396839 + IMAGE:510856) >= -0.551250 THEN PCA                                         | IMAGE:396839 is UniGene Hs.601168, transcribed locus; IMAGE:510856 is ENC1                                                   |
| <b>D. Classifiers that distinguish high-risk lung adenocarcinomas from low-risk ones</b>       |                                                                                                                              |
| IF (Z37976_at - D28473_s_at) <= (D14874_at + (U91327_at * X68090_s_at)) THEN High-Risk         | Z37976_at is LTBP2; D28473_s_at is IARS; D14874_at is ADM; U91327_at is CCT2; X68090_s_at is FCGR2A;                         |
| IF (M29610_at - Z70218_s_at) < (D14874_at + (M23161_at + X54942_at)) THEN High-Risk            | M29610_at is GYPB; Z70218_s_at is MN1; D14874_at is ADM; M23161_at is MCFD2; X54942_at is CKS2;                              |
| IF (D87465_at - U57721_at) < (HG4114-HT4384_at - (D26155_s_at - D21090_at)) THEN High-Risk     | D87465_at is SPOCK2; U57721_at is KYNU; HG4114-HT4384_at is unknown transcript; D26155_s_at is SMARCA2; D21090_at is RAD23B; |
| IF (L38486_at - M63180_at) <= (X68090_s_at - (D31888_at * D14874_at)) THEN High-Risk           | L38486_at is MFAP4; M63180_at is TARS; X68090_s_at is FCGR2A; D31888_at is RCOR1; D14874_at is ADM;                          |
| IF (L24804_at + L20320_at) >= (U70867_at + (L38486_at / Z49254_at)) THEN High-Risk             | L24804_at is PTGES3; L20320_at is CDK7; U70867_at is SLCO2A1; L38486_at is MFAP4; Z49254_at is MRPL23;                       |
